# Supplementary material for: Pepsin-digested chicken-liver hydrolysate attenuates hepatosteatosis by relieving hepatic and peripheral insulin resistance in long-term high-fat dietary habit
Source: PubMed Central journal article supplement — J Food Drug Anal. 2021 Jun 15;29(2):375–88. doi: 10.38212/2224-6614.3351 (PMC9261818; doi:10.38212/2224-6614.3351), 2021-06-15
Supplement: jfda-29-02-375-s001.pdf [file jfda-29-02-375-s001.pdf]

## **Research Highlights**

- Our chicken-liver hydrolysates (CLHs) improves the universal glucose homeostasis via sustaining hepatic and peripheral insulin sensitivities.
- CLH supplementation promotes the insulin signal.
- CLH supplementation improves lipid dyshomeostasis, thus demonstrating anti-insulin resistance, anti-hepatosteatorsis, and anti-obesity
